# Supplementary material
Source: Springer Nature journal article supplement (https://www.springermedizin.de/resource/supplementary/12955_2013_1258_MOESM5_ESM.pdf/9559178)
Supplement: MOESM5 [file 9559178]

## Supplemental Appendix C: Biserial Correlations

The point-biserial correlation[1] is defined by the following equation

$$r_{\text{pbs}} = \frac{\mu_{(+)} - \mu_{(-)}}{s_{\text{Tx}}} \sqrt{\pi_{(+)}\pi_{(-)}}$$

where  $\mu_i$  are the IBS-QOL Total Score mean values for those who report adequate relief or no relief at Week 12, respectively,  $s_{\text{Tx}}$  is the standard deviation accounting for dose level, and  $\pi_i$  are the proportions of patients who reported adequate relief or no relief, respectively. This calculation was used to assess the linear relationship between IBS-QOL total score and the IBS-AR. The resultant correlation estimate assumes a natural dichotomy and assesses the linear relationship, in the current case, between the IBS-AR probability of relief or FDA Clinical Responder status and means of the IBS-QOL total score at Week 12. The formula above also accounts for treatment dose by using the standard deviation of the IBS-QOL at Week 12, accounting for dose level received.

The biserial correlation[2] was also calculated and is given by the formula

$$r_{\text{bis}} = \frac{\mu_{(+)} - \mu_{(-)}}{s_{\text{Tx}}Z_p}$$

with similar definitions as above and

$$Z_p = \frac{1}{\sqrt{2\pi}} \exp \left\{ -\frac{1}{2} \Phi^{-1}[\pi_{(-)}]^2 \right\}$$

representing the ordinate of the standard Gaussian distribution,  $\pi_{(-)}$  indicating the proportion of patients who answered the item denoting “No Relief” for IBS-AR, being a nonresponder for the FDA Clinical Responder definition, and  $\Phi^{-1}(\cdot)$  representing the inverse of the Gaussian distribution for the threshold for positive response, i.e., below which patients report a negative response and above which they report a positive response. The biserial correlation assumes that the dichotomous variable follows an underlying Gaussian distribution. To assess statistical significance of the  $r_{\text{pbs}}$  and  $r_{\text{bis}}$  statistics, t-tests will be constructed via the following formula

$$t_i = r_i \sqrt{\frac{N}{1 - r_i^2}}$$

evaluated with  $(N - 2)$  degrees of freedom and  $i$  indexing point biserial versus biserial.

## References

1. Das Gupta S: **Point biserial correlation and its generalization.** *Psychometrika.* 1960;**25**:393-408.

2. Brogden H: **A new coefficient: Application to biserial correlation and to estimation of selective efficiency.** *Psychometrika*. 1949;**14**:169-182.
